# Supplementary material for: 3-(5-Hydroxyphenyl)-5-Phenyl-2-Pyrazolines as Toll-Like Receptor 7 Agonists
Source: Hindawi journal article supplement (doi:10.1155/2023/2151669), 2023-03-08
Supplement: f1 [file 2151669.f1.zip]

Archive with 2 entries (2 files):
- Suppl Figures_Rev (2).pdf
- Suppl Materials_Rev.pdf
