# Supplementary material for: 3-(5-Hydroxyphenyl)-5-Phenyl-2-Pyrazolines as Toll-Like Receptor 7 Agonists
Source: Hindawi journal article supplement (doi:10.1155/2023/2151669), 2023-03-08

## Supplementary Figure 1

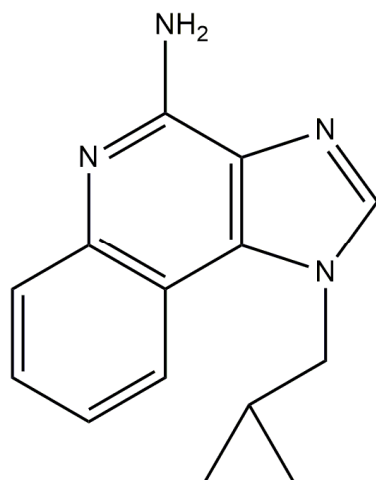

(a)

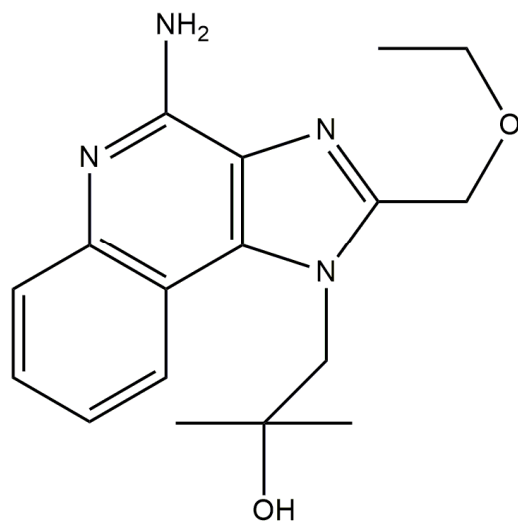

(b)

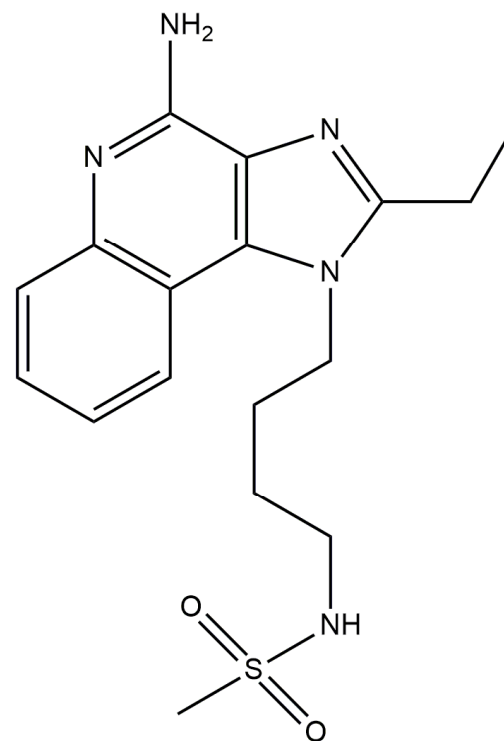

(c)

## Supplementary Figure 2

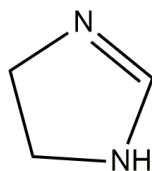

**(a)**

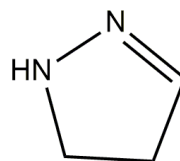

**(b)**

## Supplementary Figure 3

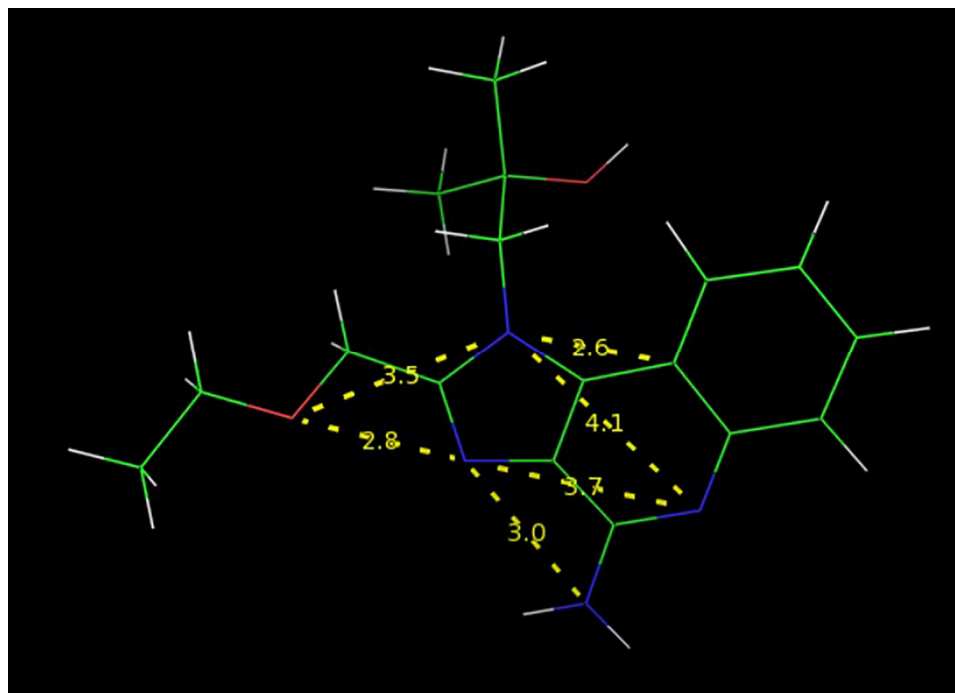

(a)

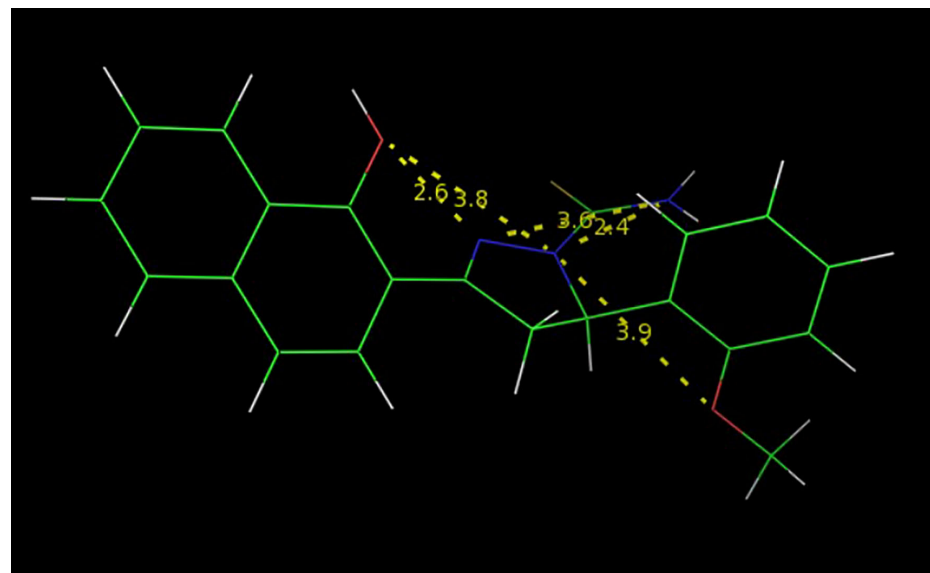

(b)

## Supplementary Figure 4

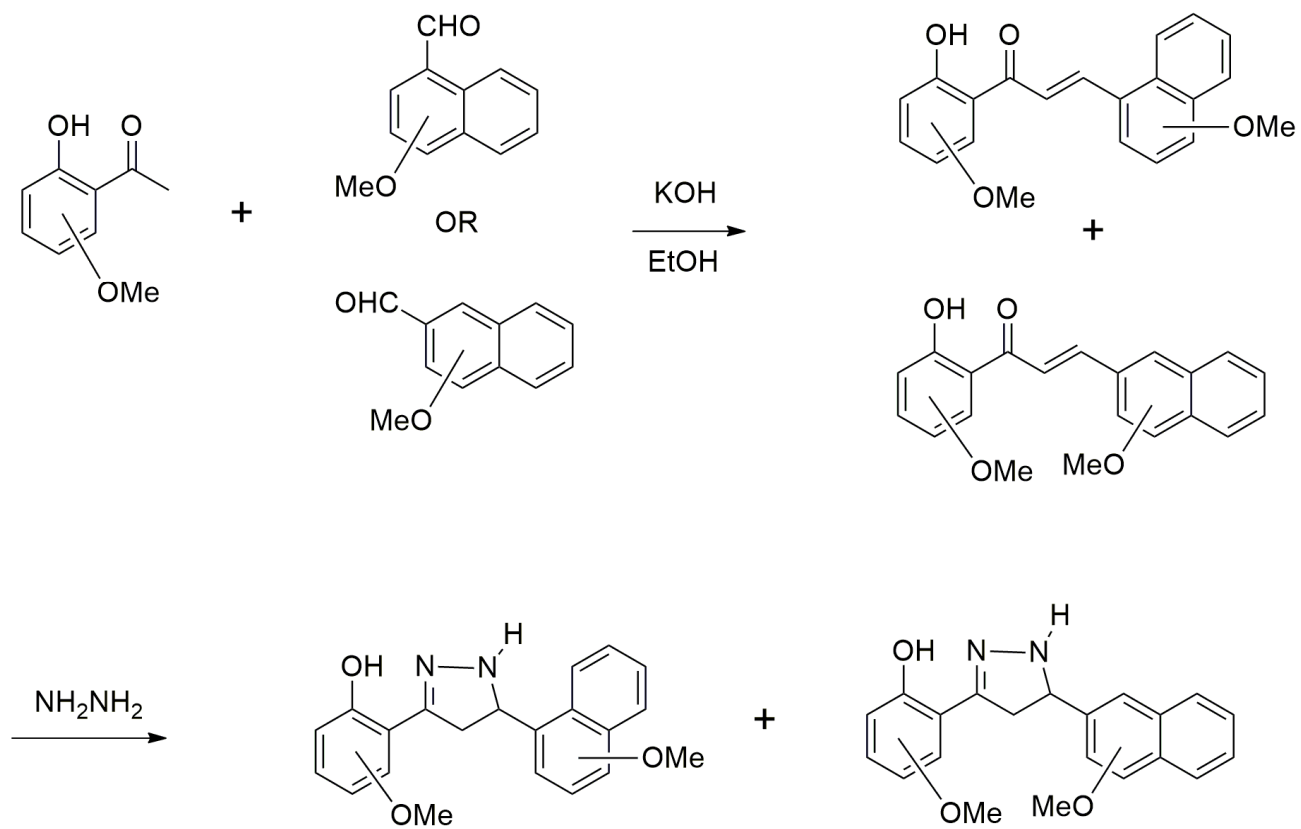

Supplementary Figure 5

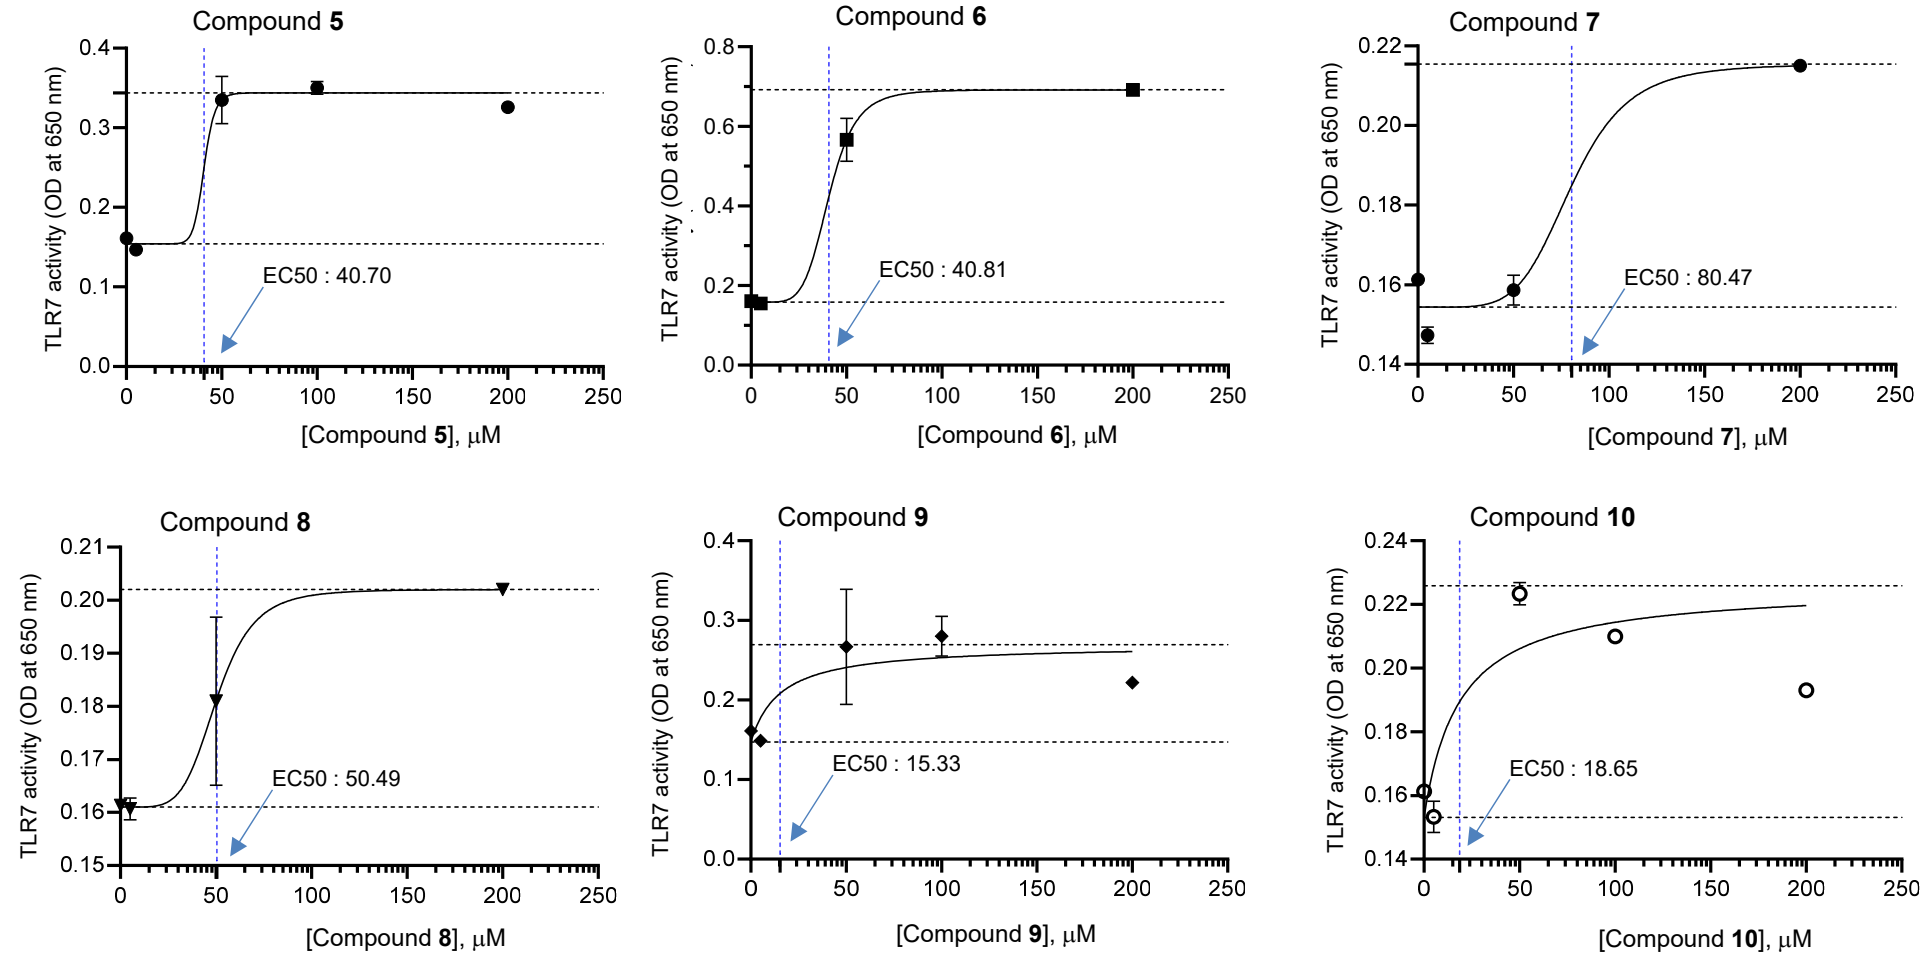

## Supplementary Figure 6

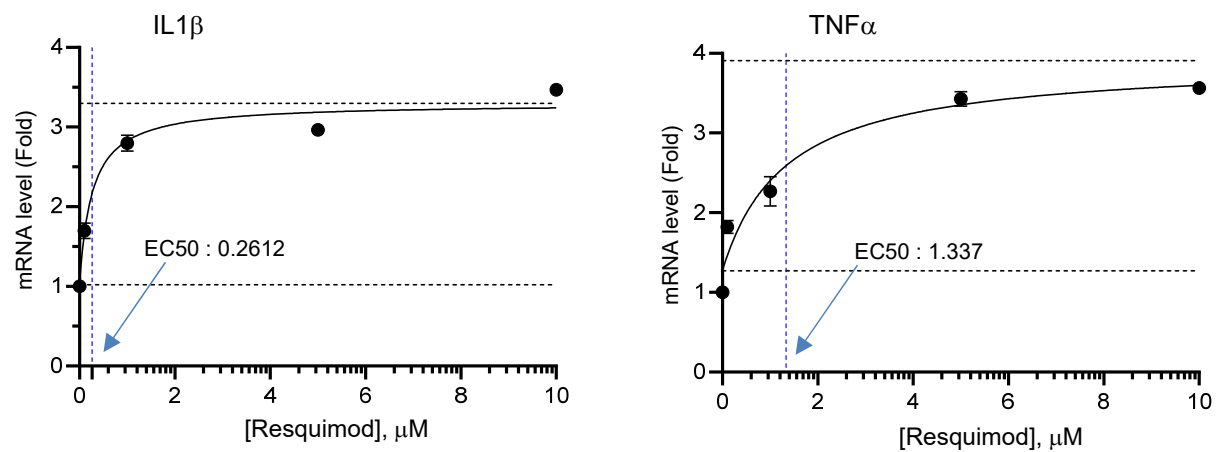

(a)

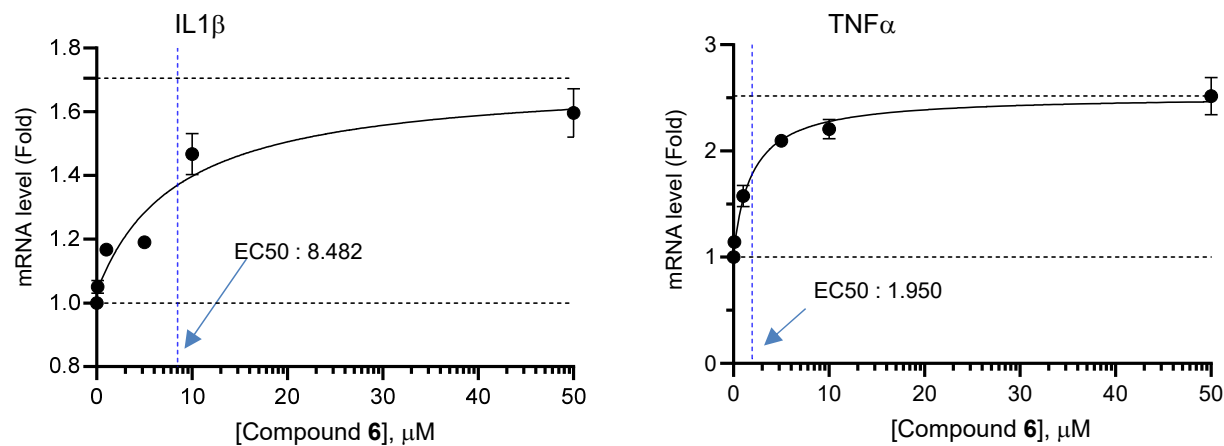

(b)

## Supplementary Figure 7

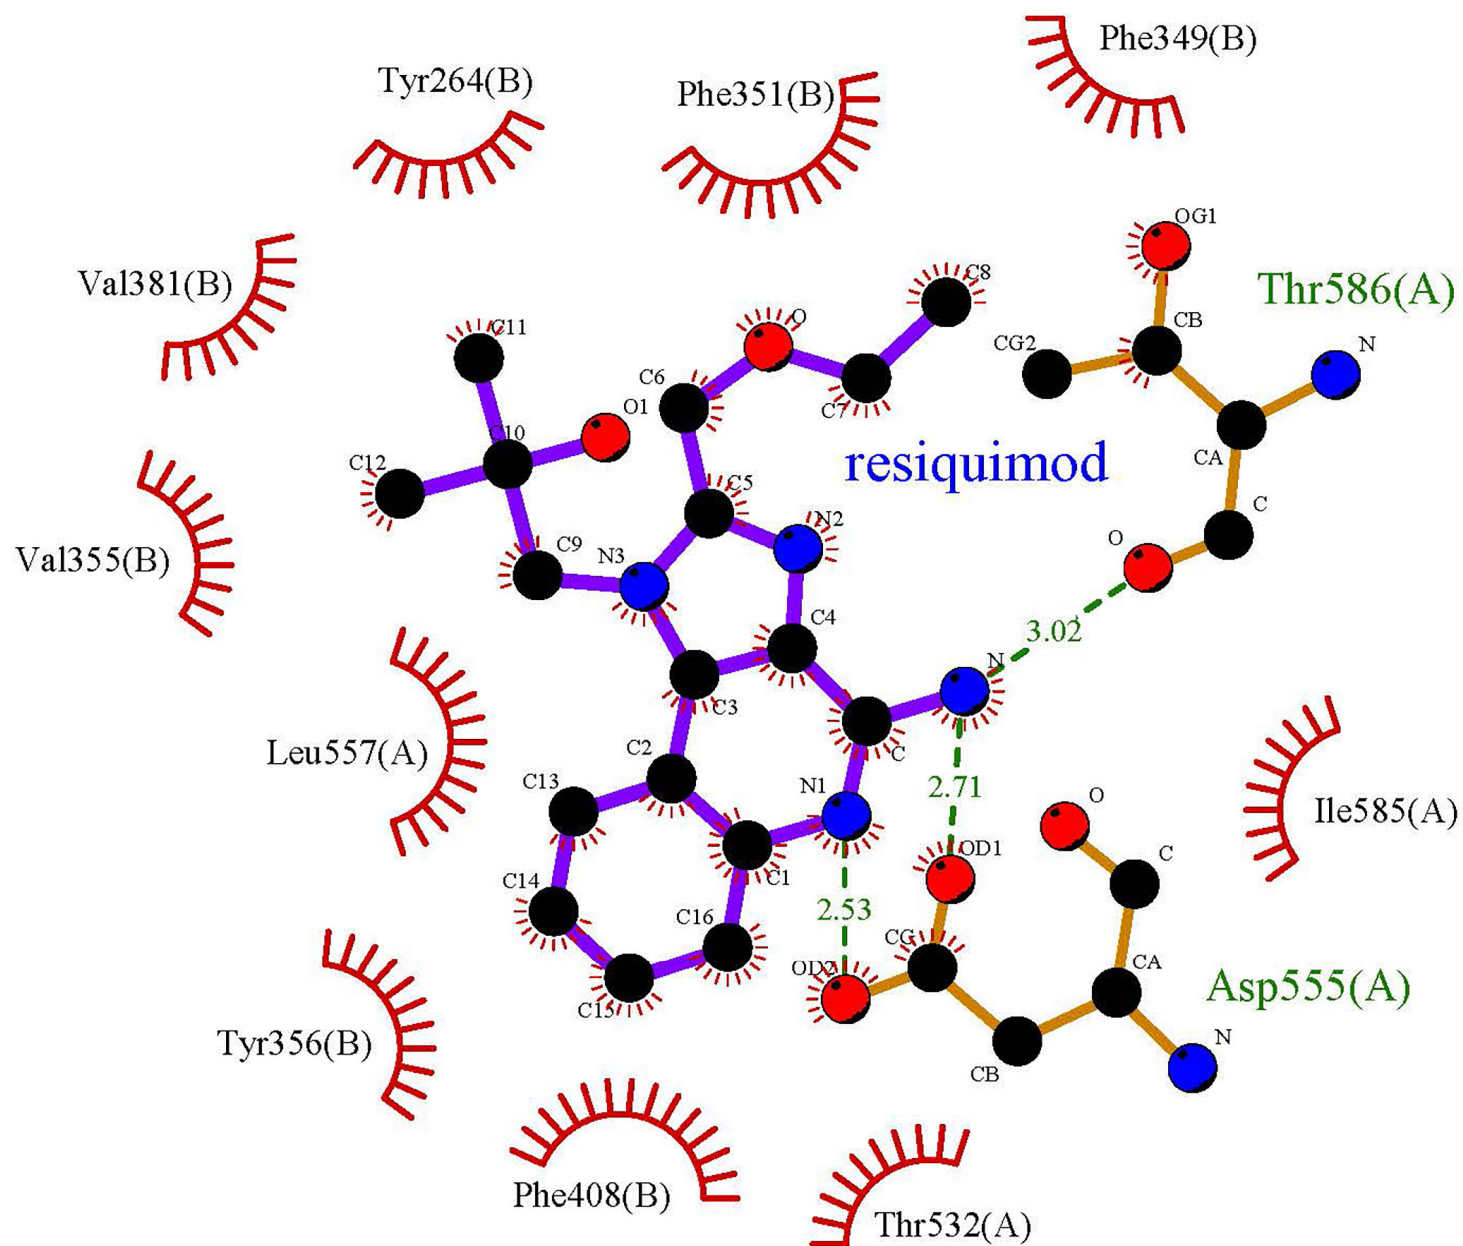

Supplementary Figure 8

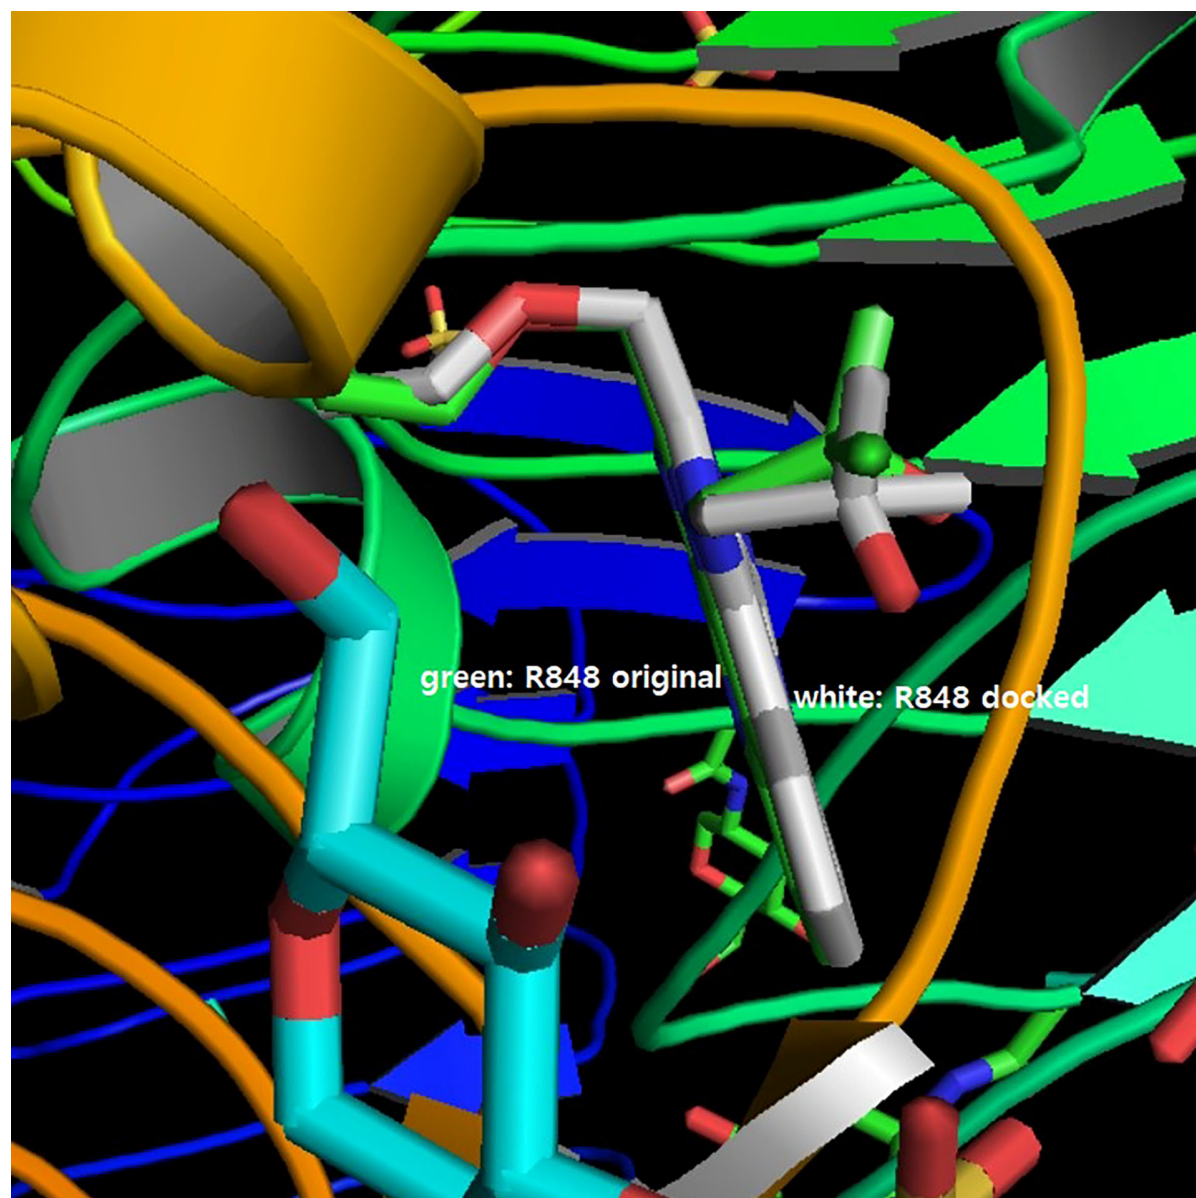

Supplement: f1 [file 2151669.f1.zip]
