# Supplementary material for: 3-(5-Hydroxyphenyl)-5-Phenyl-2-Pyrazolines as Toll-Like Receptor 7 Agonists
Source: Hindawi journal article supplement (doi:10.1155/2023/2151669), 2023-03-08
Supplement: f1 [file 2151669.f1.zip]

## Supplementary Materials

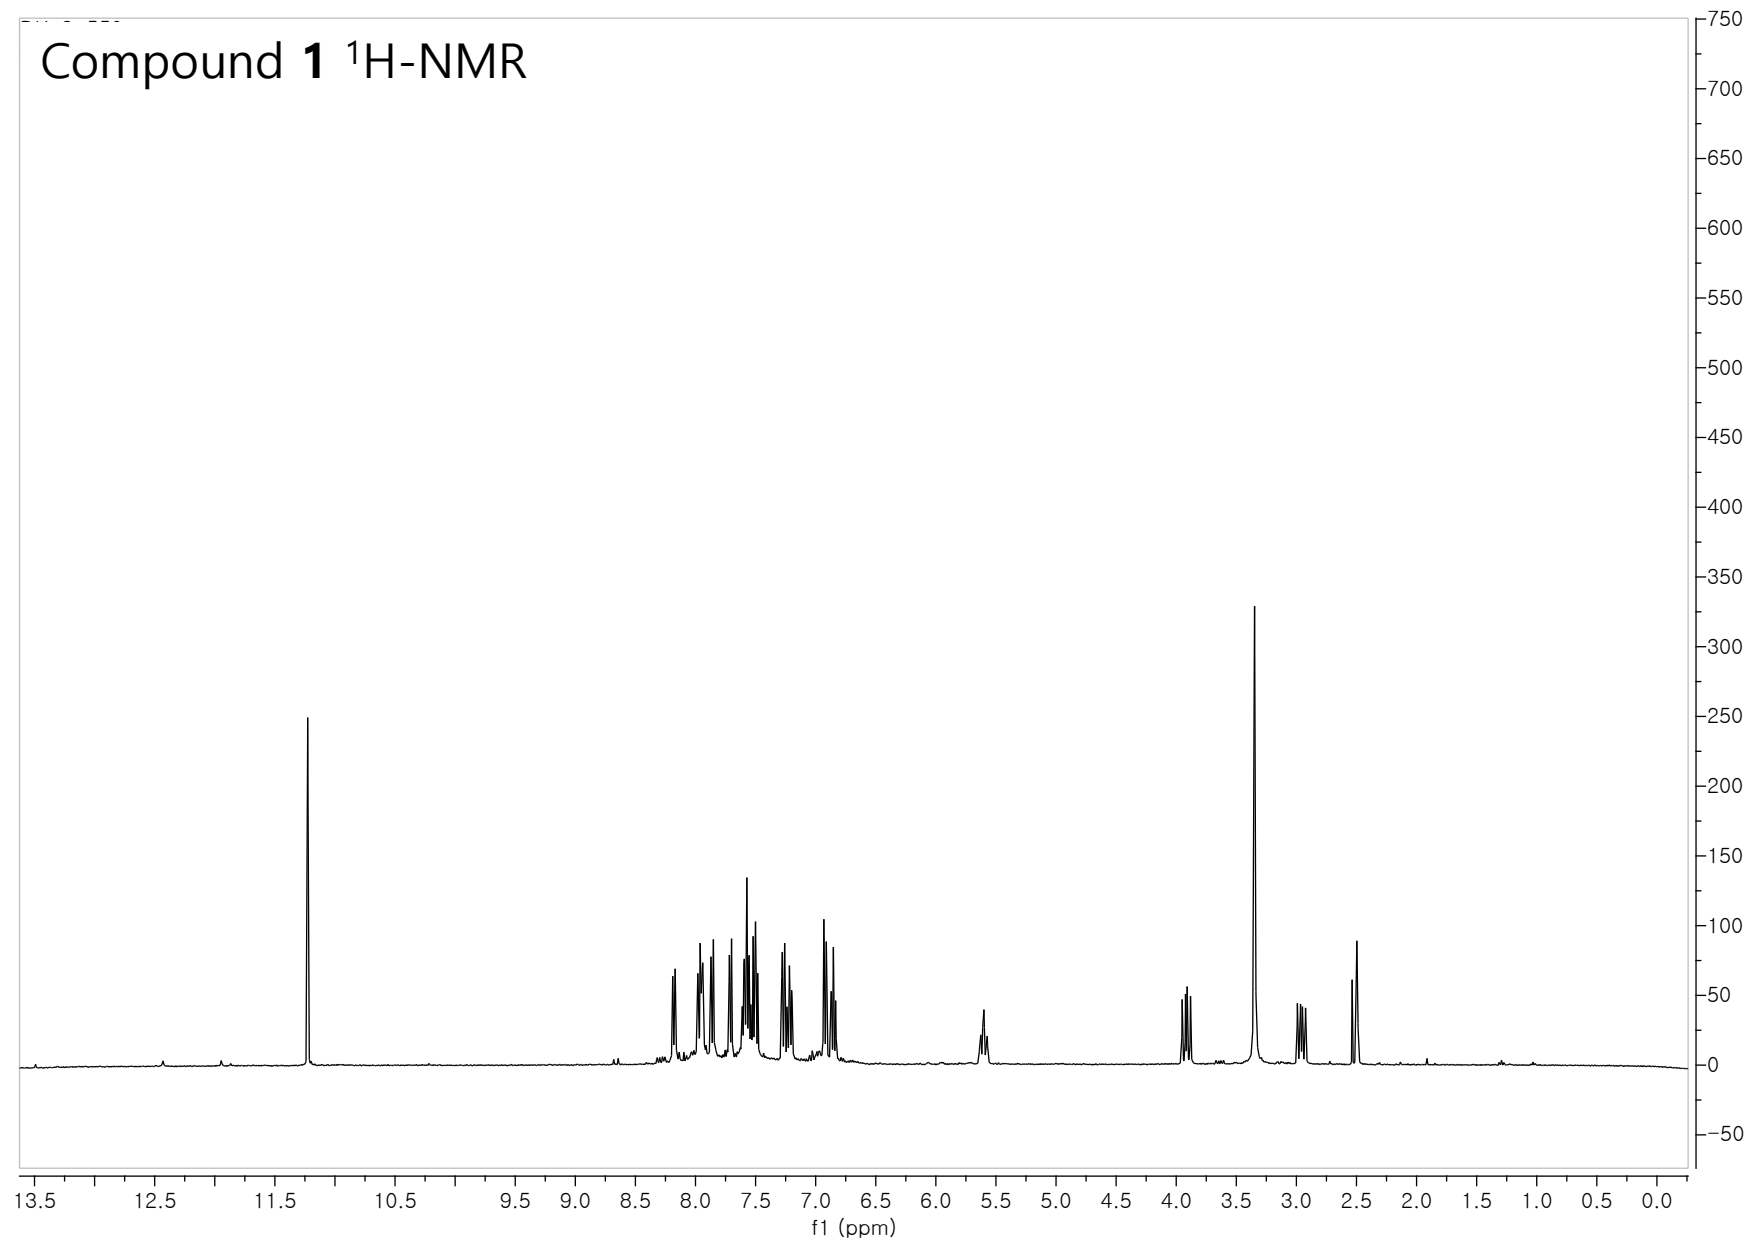

Compound **1**  $^{13}\text{C}$ -NMR

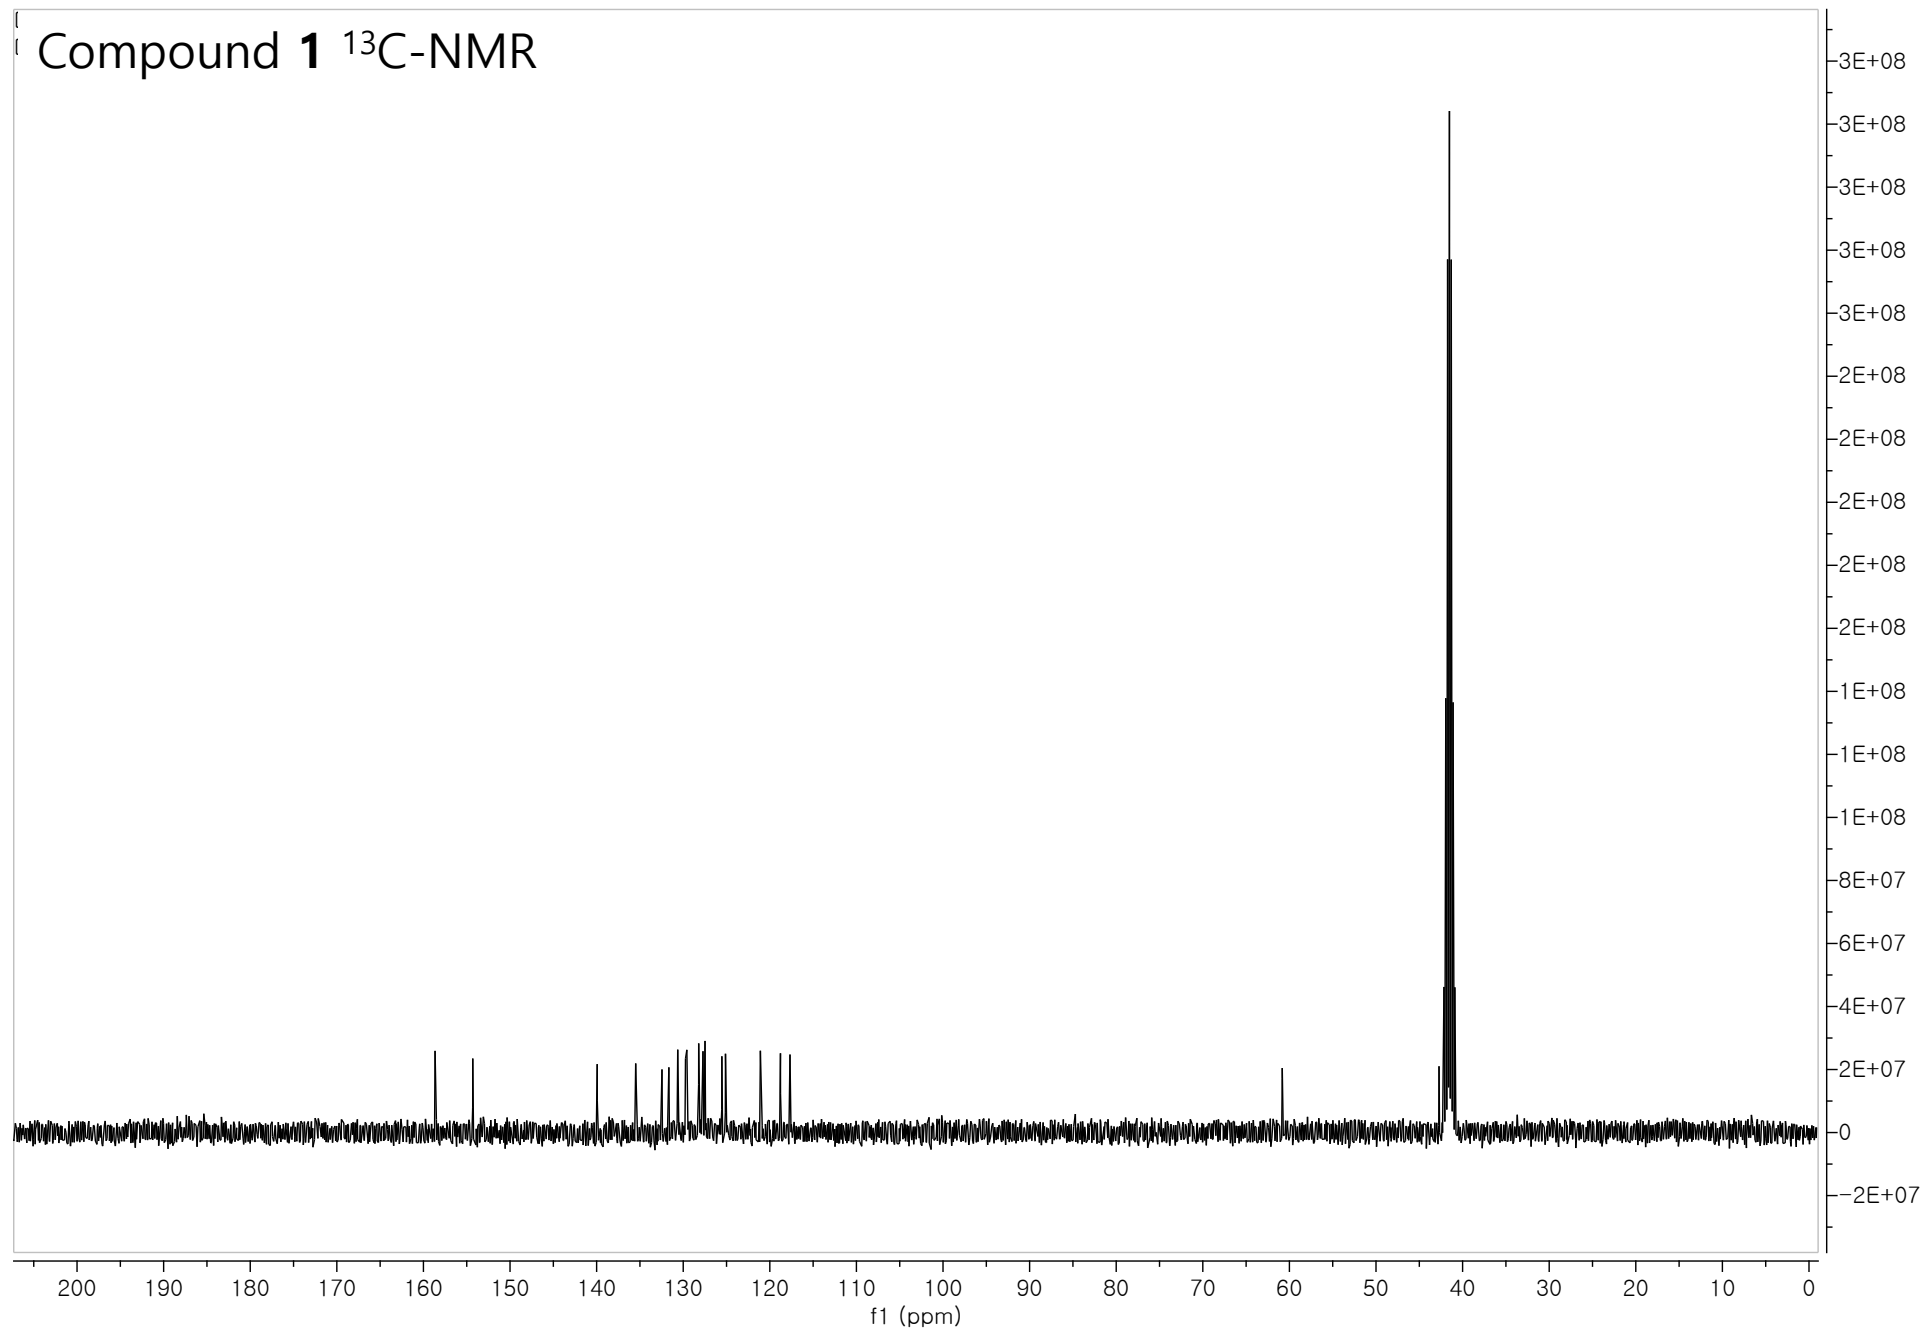

# Compound 1 HRMS

## Qualitative Analysis Report

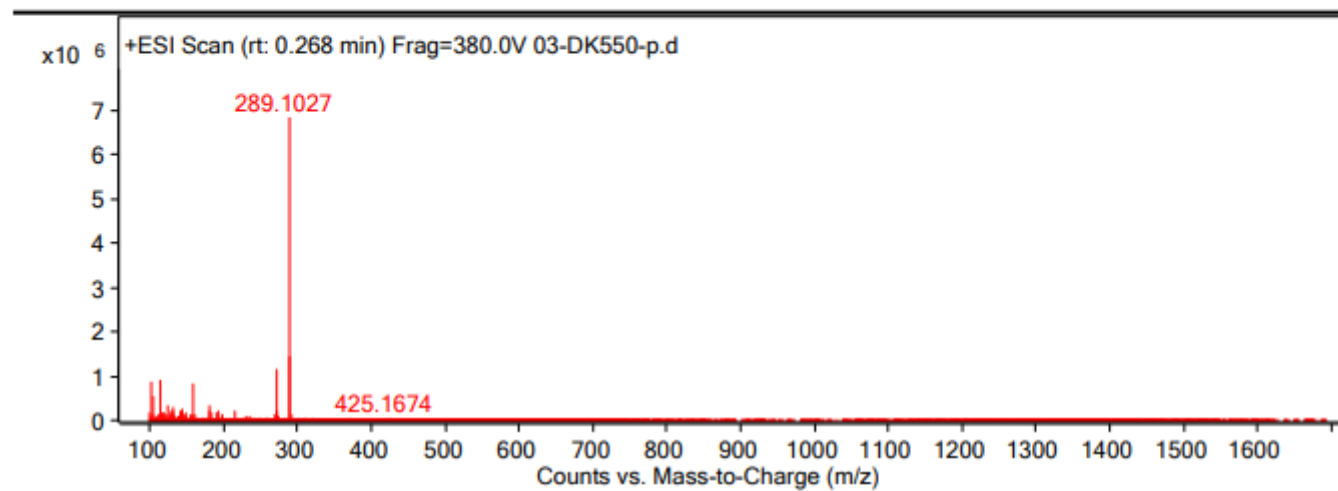

### Peak List

| m/z      | z | Abund      |
|----------|---|------------|
| 102.0019 |   | 865749.31  |
| 103.9972 |   | 527655.38  |
| 113.9512 | 1 | 886460.25  |
| 122.9504 |   | 317810.5   |
| 131.9891 |   | 289994.84  |
| 157.9855 | 1 | 837785.63  |
| 179.9705 |   | 336091.72  |
| 272.0772 | 1 | 1147669.75 |
| 289.1027 | 1 | 6844997.5  |
| 290.105  | 1 | 1427494.5  |

--- End Of Report ---

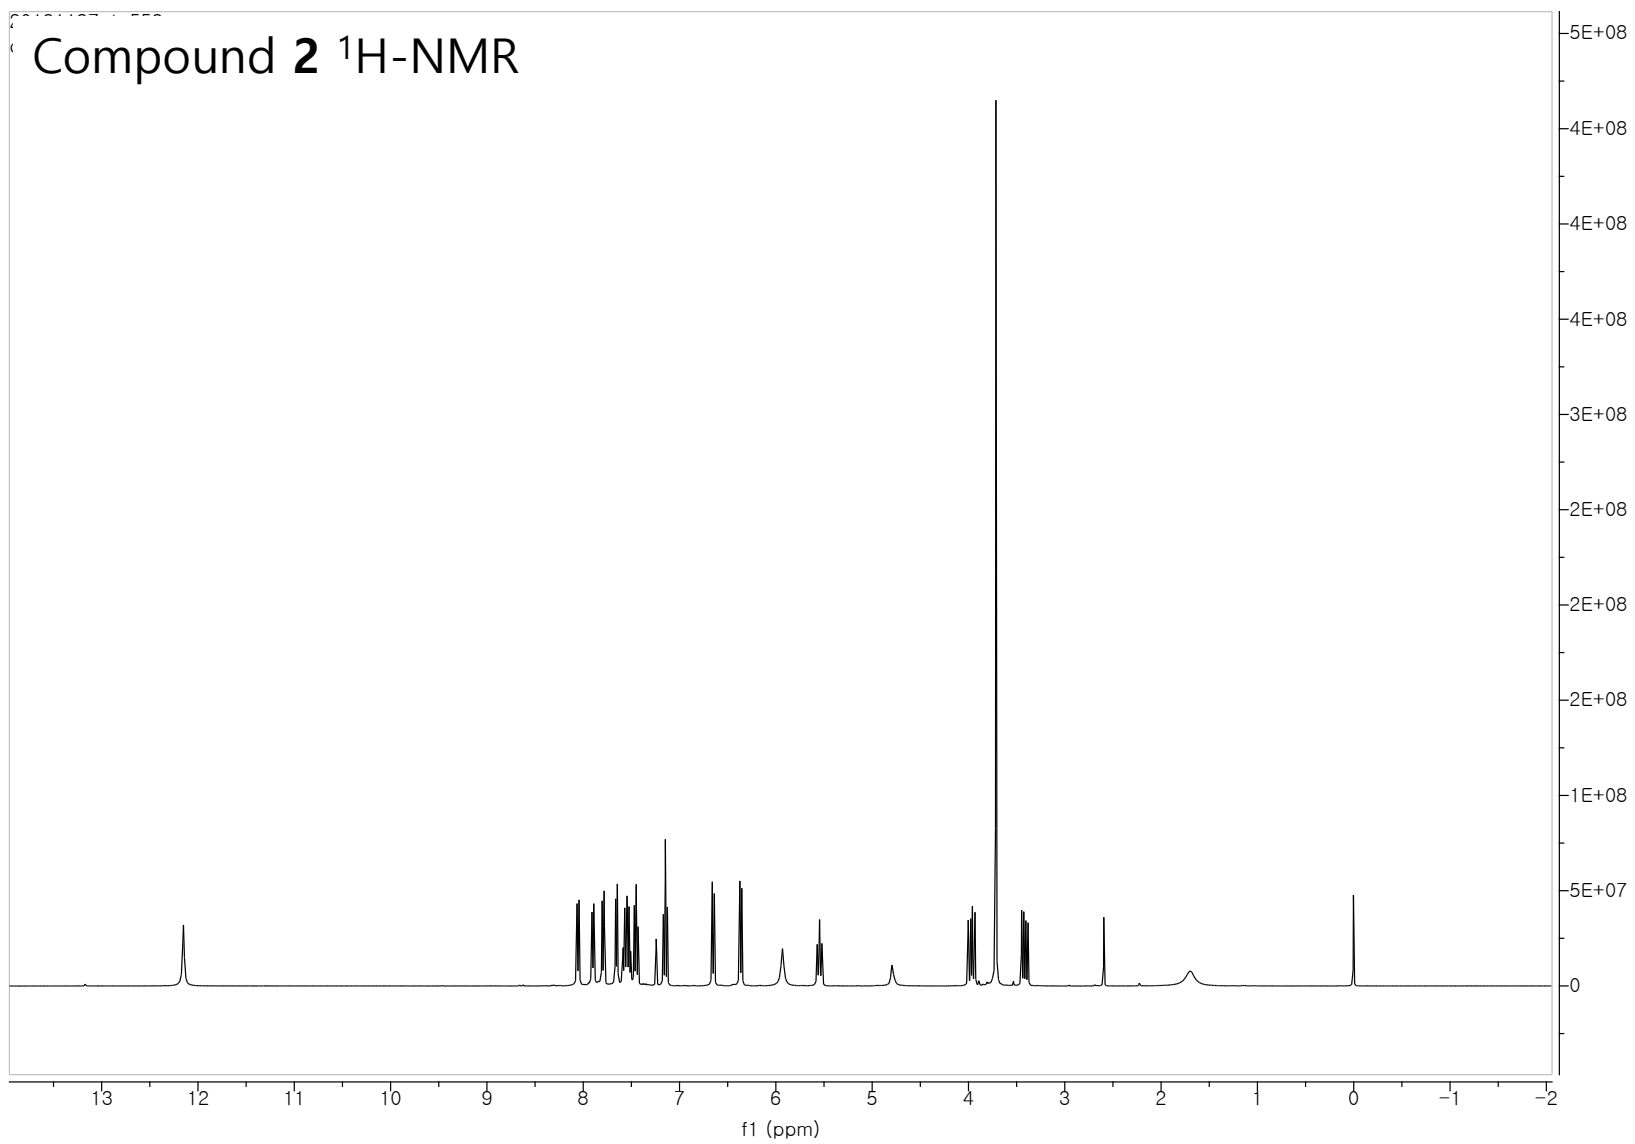

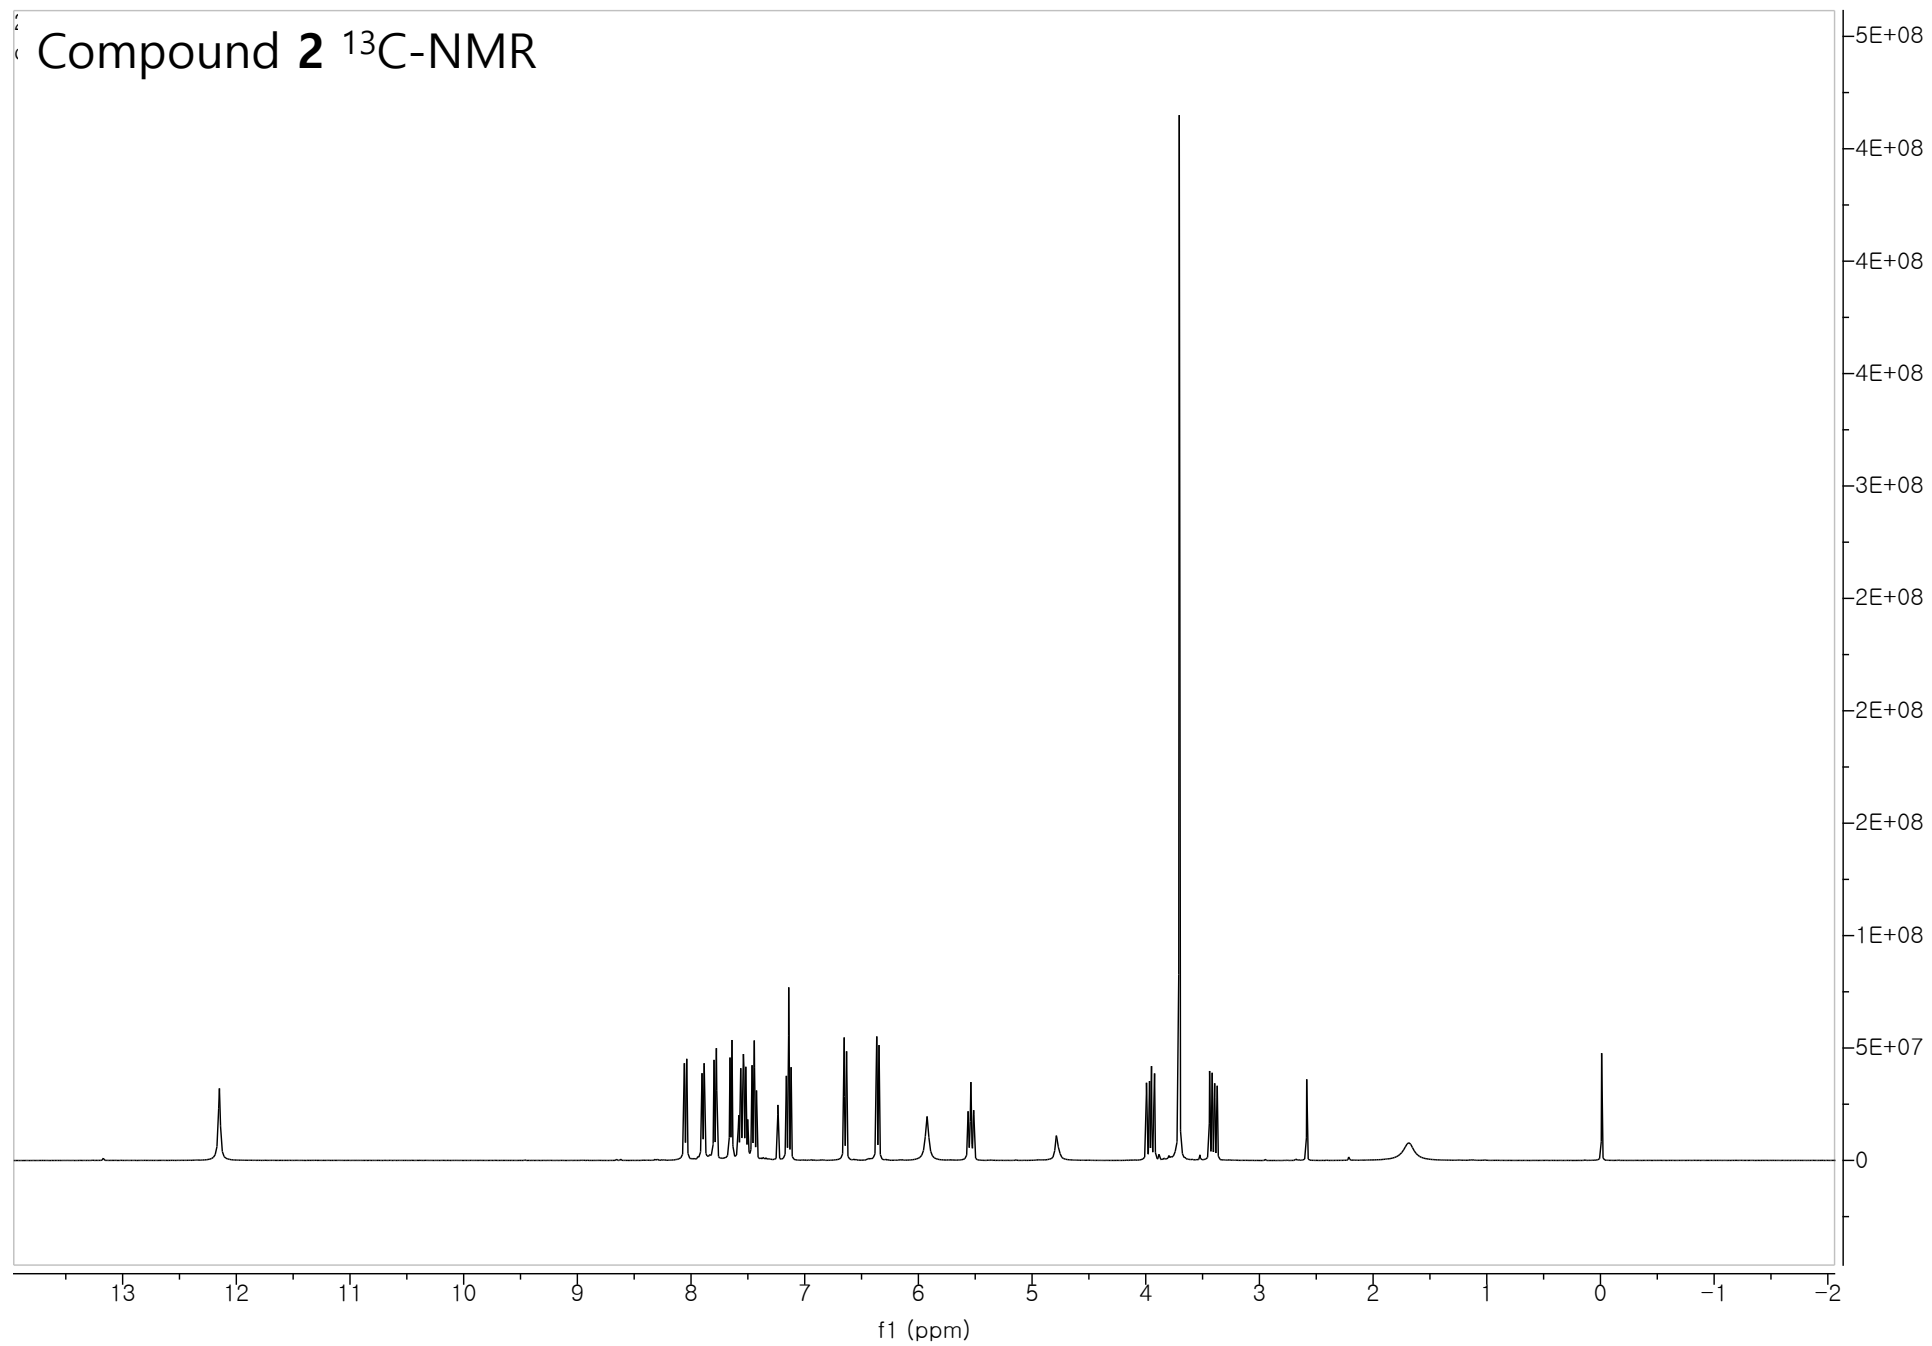

# Compound 2 HRMS

## Qualitative Analysis Report

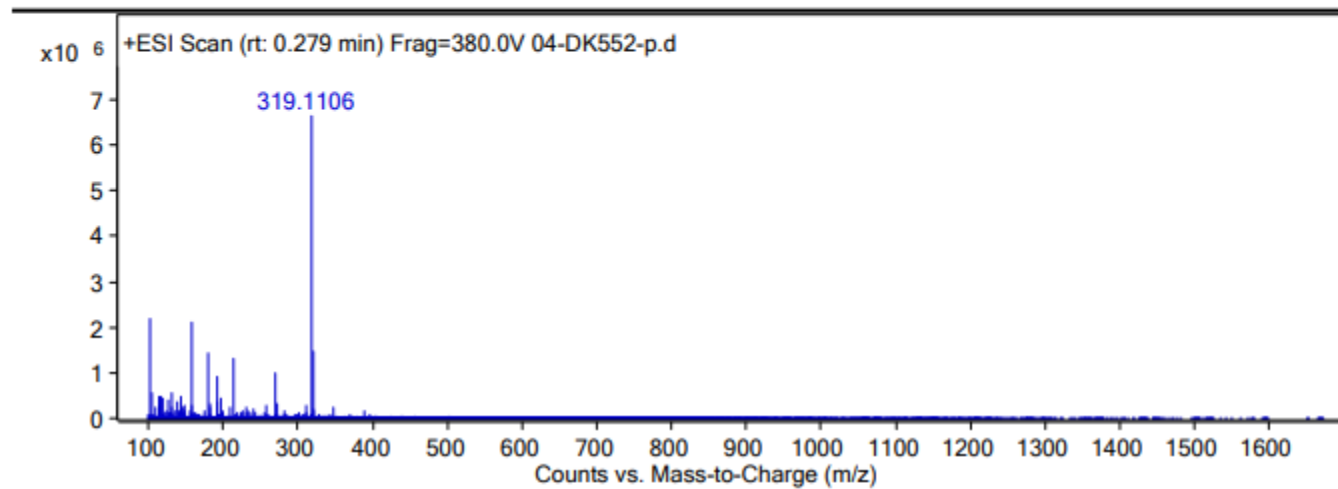

### Peak List

| m/z      | z | Abund      |
|----------|---|------------|
| 102.0022 |   | 2207170.25 |
| 103.9975 |   | 554096.31  |
| 129.9938 |   | 548937.25  |
| 157.9858 | 1 | 2127697.25 |
| 179.9711 | 1 | 1448639    |
| 190.9239 |   | 928375.19  |
| 214.8947 |   | 1315371.75 |
| 268.893  | 1 | 1011193.88 |
| 319.1106 | 1 | 6650530    |
| 320.113  | 1 | 1455688.38 |

--- End Of Report ---

# Compound **3** <sup>1</sup>H-NMR

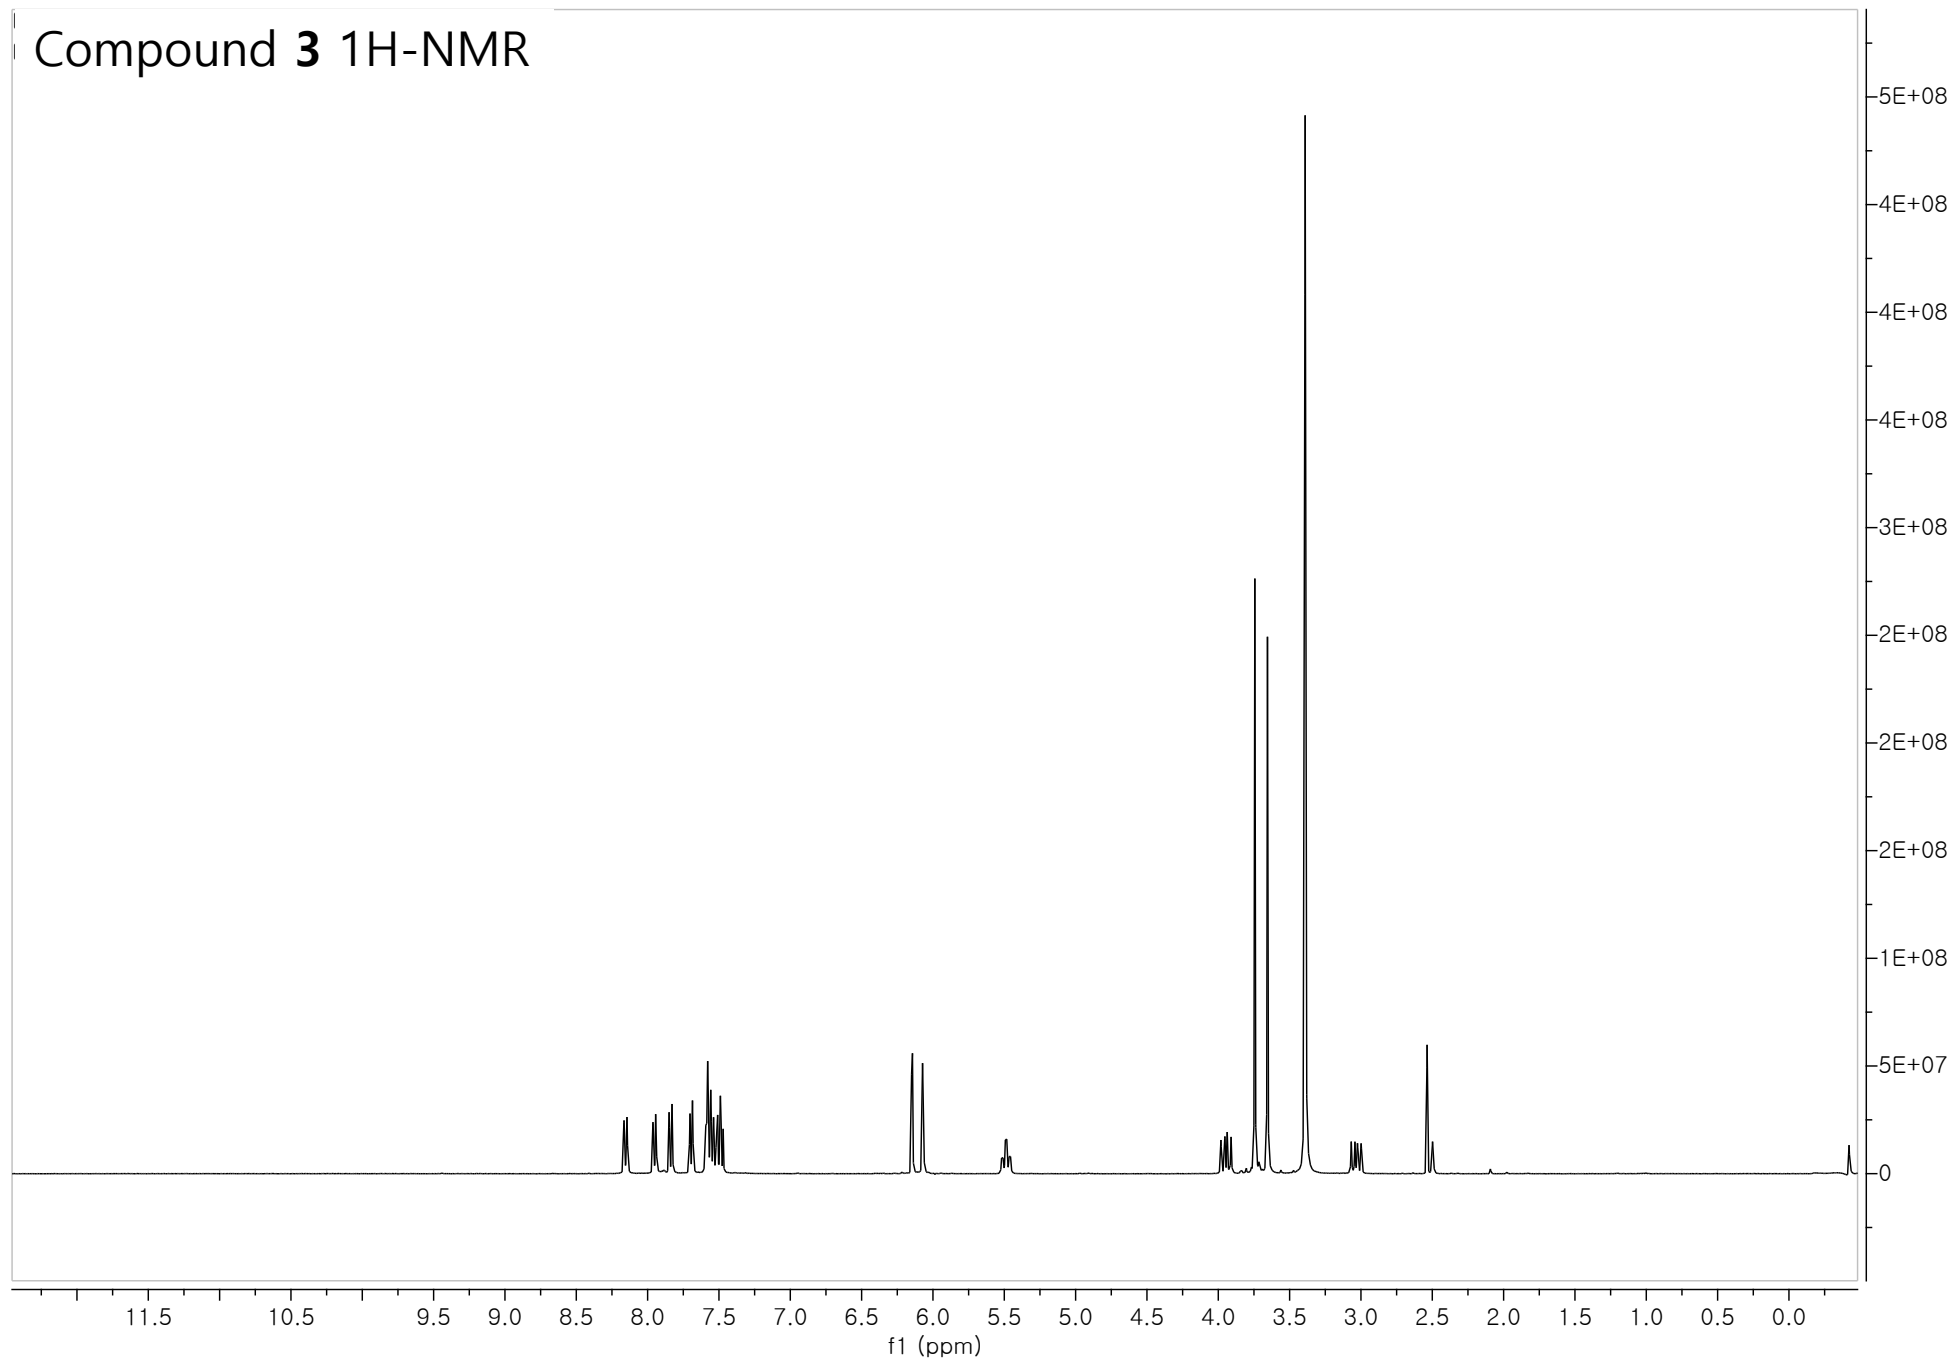

# Compound **3** <sup>13</sup>C-NMR

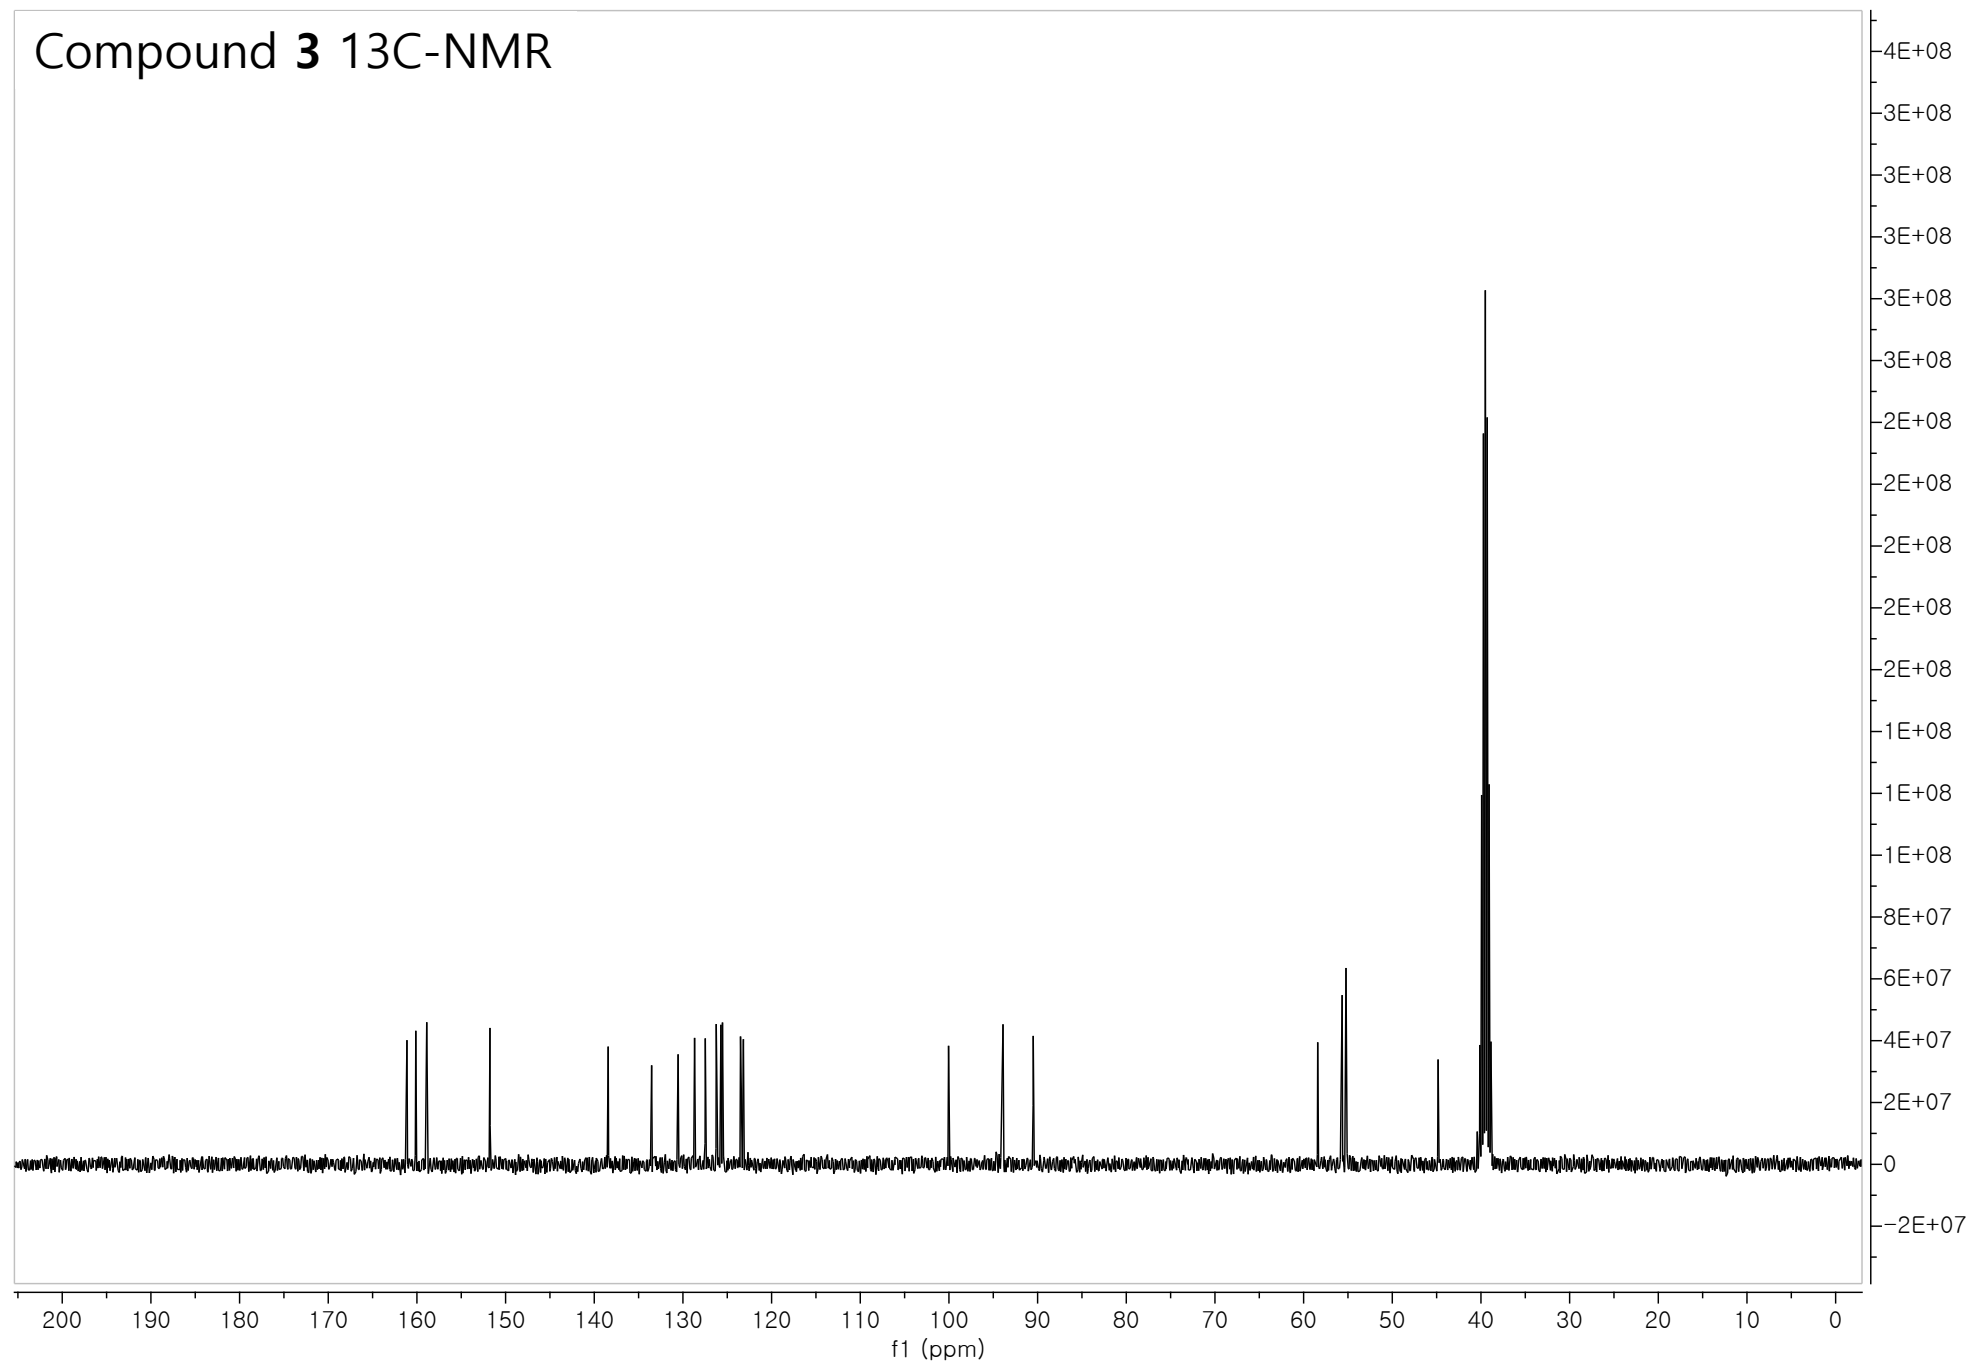



# Compound **3** HRMS

## Qualitative Analysis Report

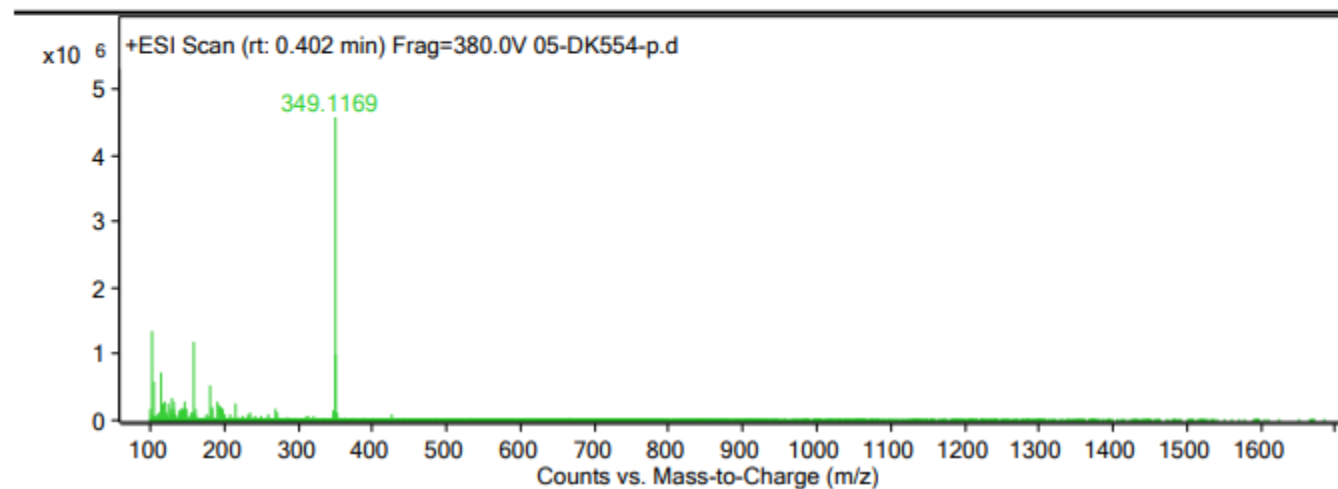

### Peak List

| m/z      | z | Abund      |
|----------|---|------------|
| 102.002  |   | 1353493.5  |
| 103.9974 |   | 573393.13  |
| 113.9513 |   | 702057.31  |
| 129.9935 |   | 316742.09  |
| 131.9892 |   | 287514.44  |
| 145.0193 |   | 269191.44  |
| 157.9856 | 1 | 1180314.63 |
| 179.9708 | 1 | 518869.47  |
| 349.1169 | 1 | 4569183    |
| 350.1198 | 1 | 977658.94  |

--- End Of Report ---

Compound **10**  $^1\text{H}$ -NMR

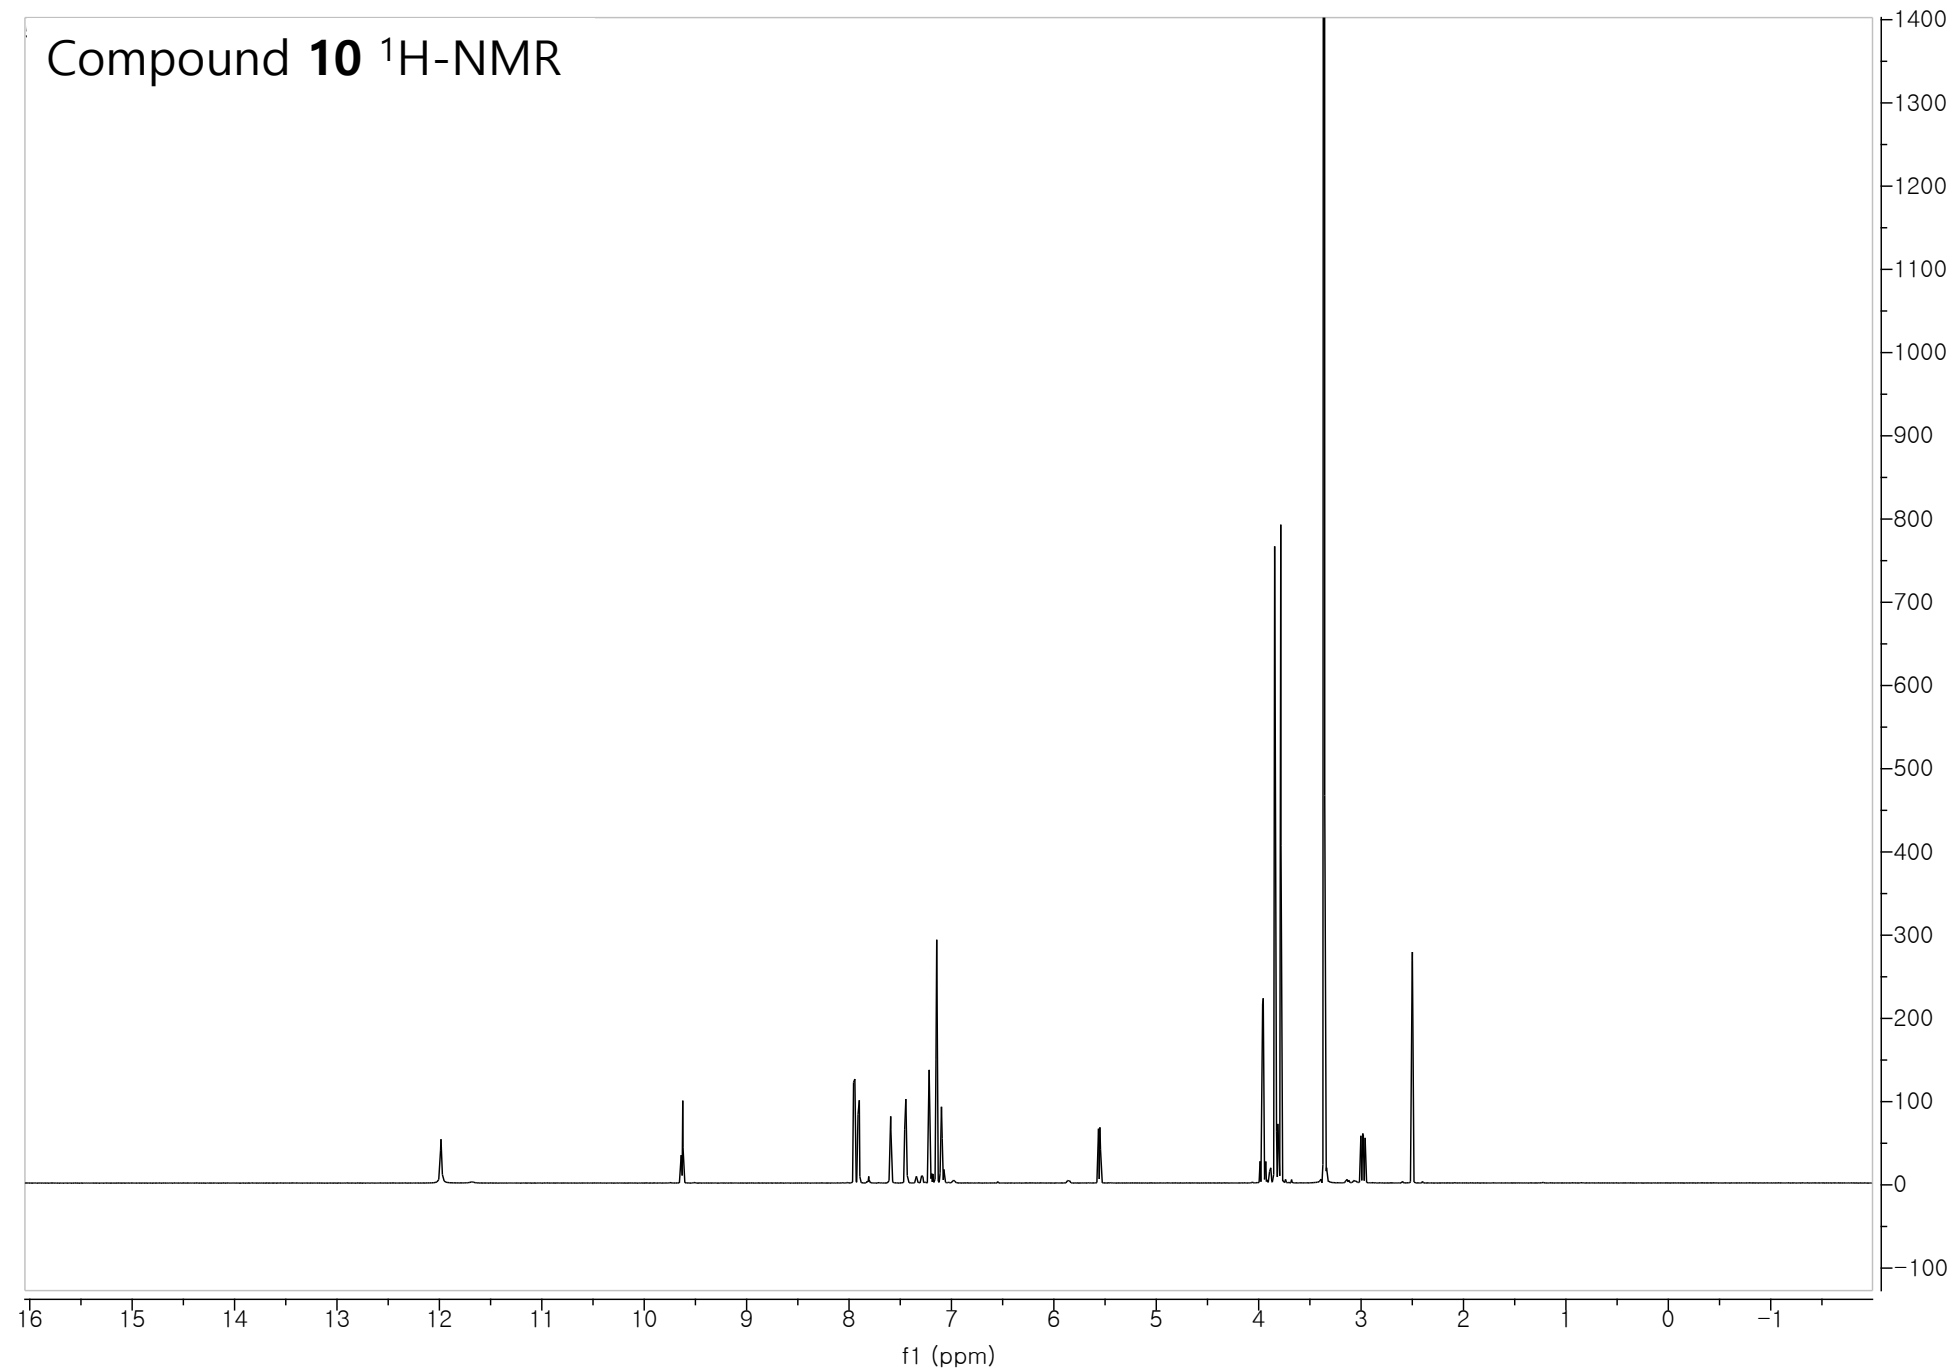

Compound **10**  $^{13}\text{C}$ -NMR

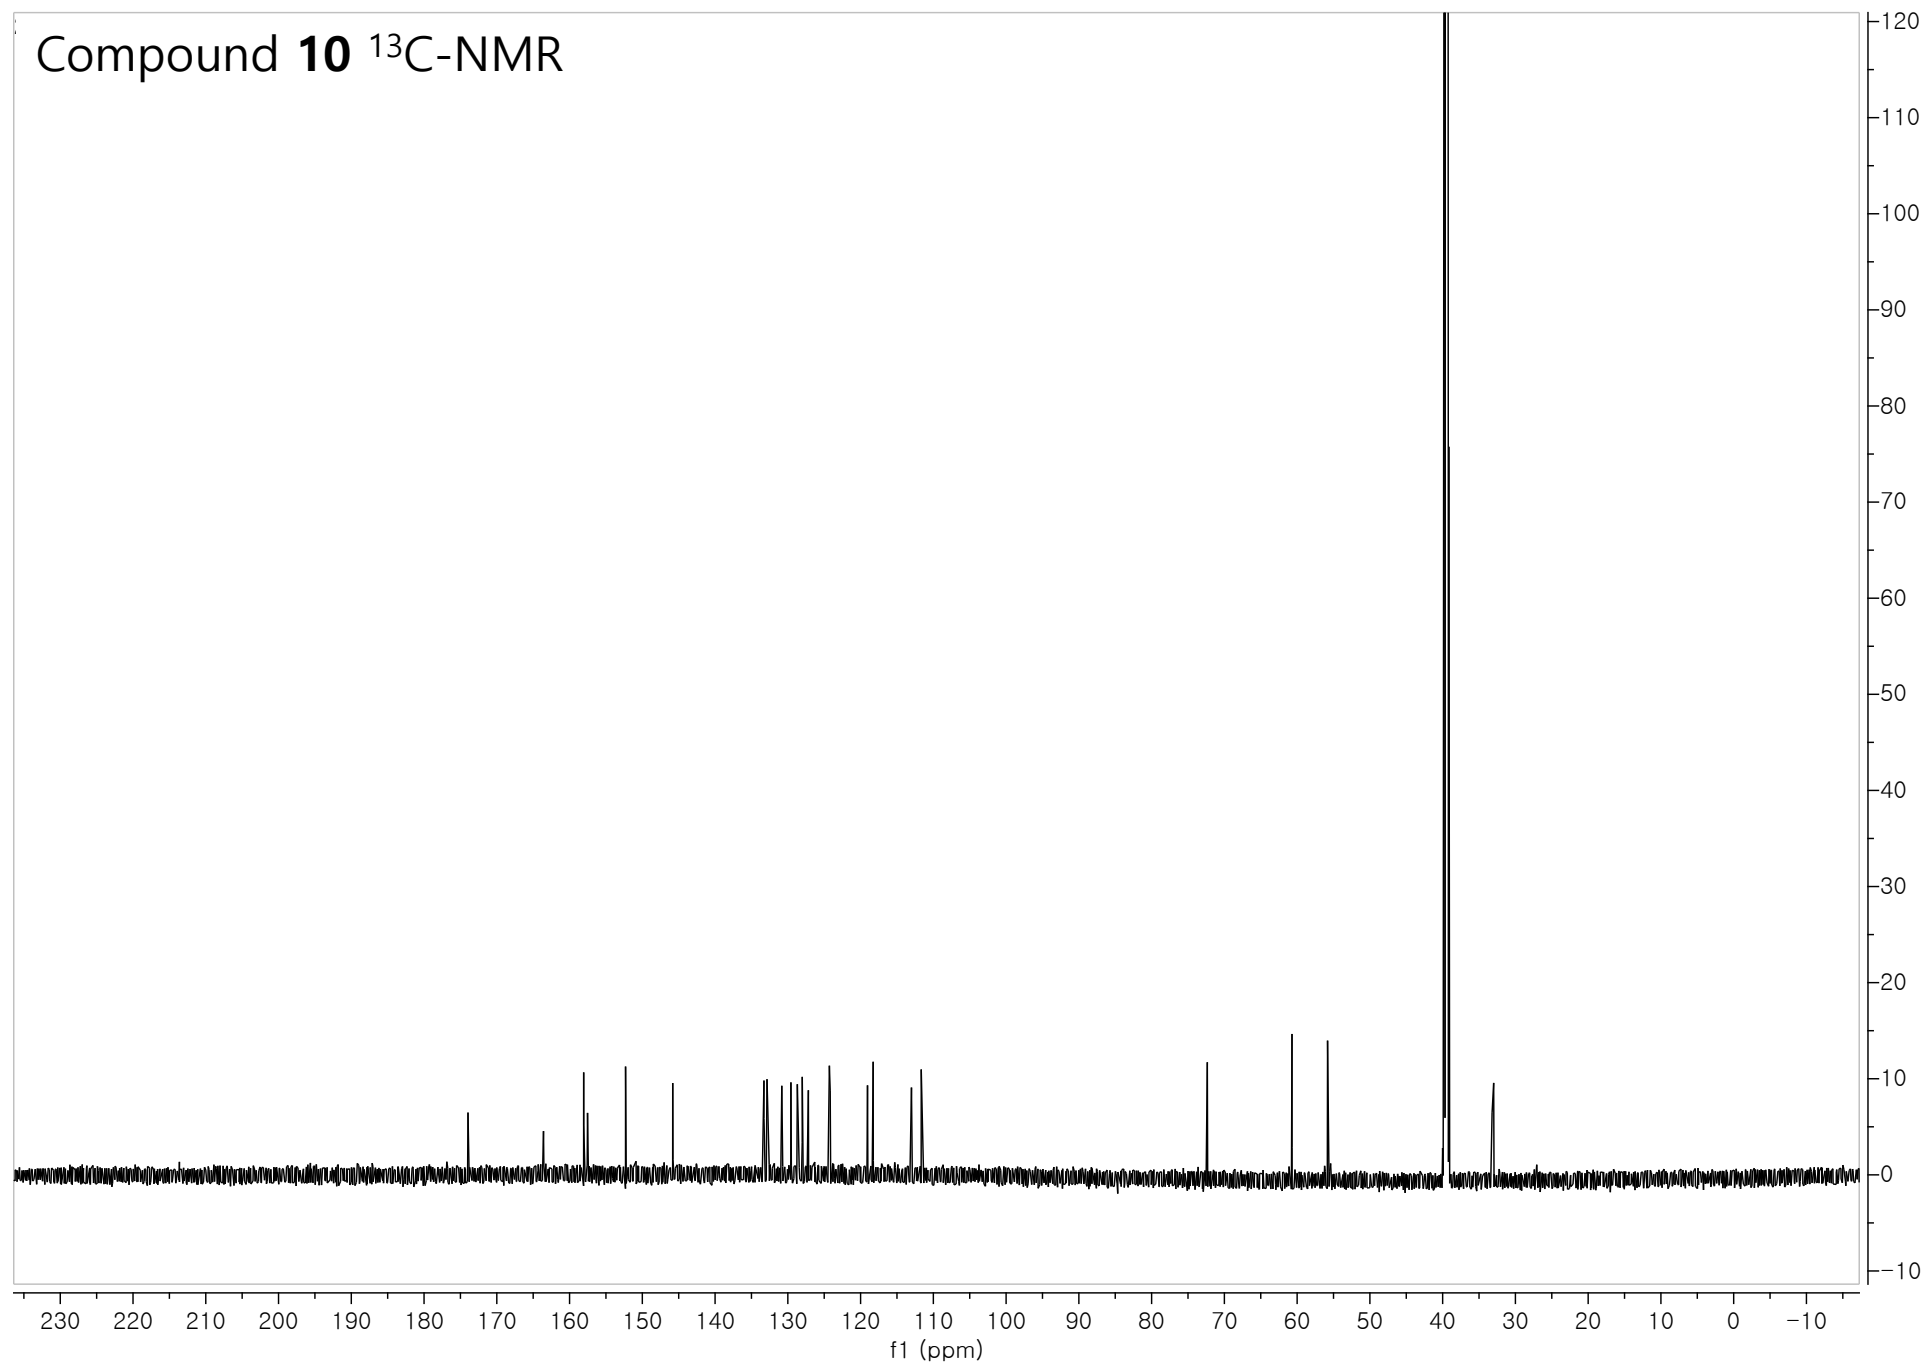

---

|                    |                  |                 |
|--------------------|------------------|-----------------|
| Fragmentor Voltage | Collision Energy | Ionization Mode |
| 380                | 0                | ESI             |

---

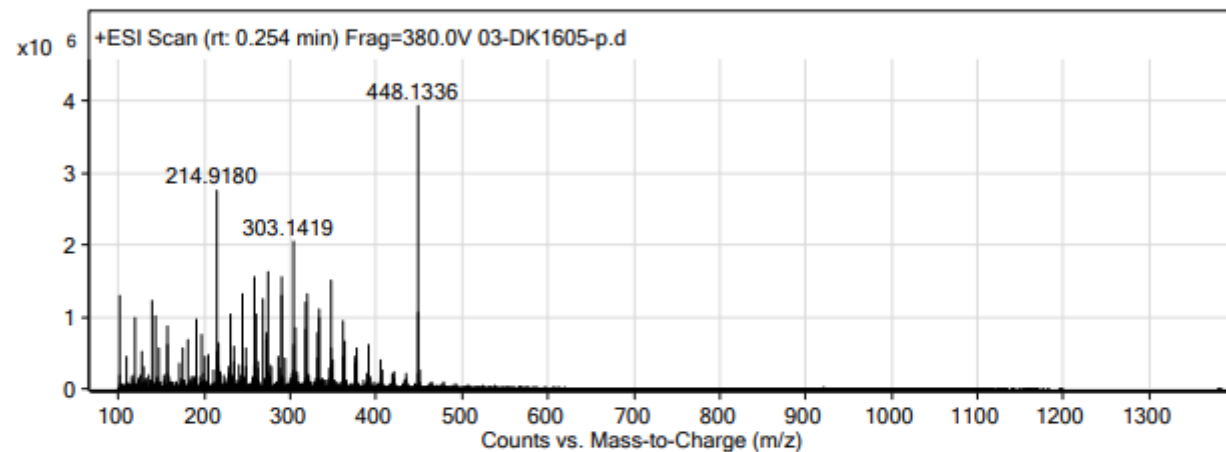**Peak List**

| <i>m/z</i> | <i>z</i> | Abund      |
|------------|----------|------------|
| 102.013    |          | 1308283.75 |
| 214.918    |          | 2754616    |
| 245.0998   |          | 1332388.63 |
| 259.1154   |          | 1562886.25 |
| 275.1467   |          | 1624325.63 |
| 289.1264   |          | 1552926.5  |
| 303.1419   | 1        | 2063890.25 |
| 319.1729   |          | 1318101.75 |
| 347.1682   | 1        | 1520762    |
| 448.1336   | 1        | 3944050.5  |

---

|                    |                  |                 |
|--------------------|------------------|-----------------|
| Fragmentor Voltage | Collision Energy | Ionization Mode |
| 380                | 0                | ESI             |

---
